1 **Genomic surveillance and phylogenetic analysis reveal multiple introductions of**  
2 **SARS-CoV-2 into a global travel hub in the Middle East**

3 Ahmad Abou Tayoun<sup>1,2‡</sup>, Tom Loney<sup>2‡</sup>, Hamda Khansaheb<sup>3</sup>, Sathishkumar  
4 Ramaswamy<sup>1</sup>, Divinlal Harilal<sup>1</sup>, Zulfa Omar Deesi<sup>4</sup>, Rupa Murthy Varghese<sup>4</sup>, Hanan Al  
5 Suwaidi<sup>2</sup>, Abdulmajeed Alkhajeh<sup>3</sup>, Laila Mohamed AlDabal<sup>5</sup>, Mohammed Uddin<sup>2,6</sup>,  
6 Rifat Hamoudi<sup>7</sup>, Rabih Halwani<sup>7</sup>, Abiola Senok<sup>2</sup>, Qutayba Hamid<sup>8</sup>, Norbert  
7 Nowotny<sup>2,9\*</sup>, Alawi Alsheikh-Ali<sup>2\*</sup>

8 <sup>1</sup>Al Jalila Genomics Center, Al Jalila Children's Hospital, Dubai, United Arab Emirates.

9 <sup>2</sup>College of Medicine, Mohammed Bin Rashid University of Medicine and Health  
10 Sciences, Dubai, United Arab Emirates.

11 <sup>3</sup>Medical Education & Research Department, Dubai Health Authority, Dubai, United  
12 Arab Emirates.

13 <sup>4</sup>Microbiology and Infection Control Unit, Pathology and Genetics Department, Latifa  
14 Women and Children Hospital, Dubai Health Authority, Dubai, United Arab Emirates.

15 <sup>5</sup>Medical Affairs Department, Rashid Hospital, Dubai Health Authority, Dubai, United  
16 Arab Emirates.

17 <sup>6</sup>The Centre for Applied Genomics, The Hospital for Sick Children, Toronto, ON,  
18 Canada

19 <sup>7</sup>Clinical Sciences Department, College of Medicine, University of Sharjah, Sharjah,  
20 United Arab Emirates.

21 <sup>8</sup>College of Medicine, University of Sharjah, Sharjah, United Arab Emirates.

22 <sup>9</sup>Institute of Virology, University of Veterinary Medicine Vienna, Vienna, Austria.

23 <sup>‡</sup>Joint first authorship

24 <sup>\*</sup>Corresponding authors: Norbert Nowotny, Institute of Virology, University of  
25 Veterinary Medicine Vienna, Veterinaerplatz 1, 1210 Vienna, Austria; email:  
26 [norbert.nowotny@vetmeduni.ac.at](mailto:norbert.nowotny@vetmeduni.ac.at). <https://orcid.org/0000-0002-3548-571X>; and

27 Alawi Alsheikh-Ali, College of Medicine, Mohammed Bin Rashid University of  
28 Medicine and Health Sciences, Building 14, Dubai Healthcare City, Dubai, United Arab  
29 Emirates; email: [Alawi.Alsheikhali@mbru.ac.ae](mailto:Alawi.Alsheikhali@mbru.ac.ae). <https://orcid.org/0000-0002-1213-4546>.  
30

31 **Abstract**

32 International travel played a significant role in the early global spread of SARS-  
33 CoV-2. Understanding transmission patterns from different regions of the world  
34 will further inform global dynamics of the pandemic. Using data from Dubai in  
35 the United Arab Emirates (UAE), a major international travel hub in the Middle  
36 East, we establish SARS-CoV-2 full genome sequences from the index and early  
37 COVID-19 patients in the UAE. The genome sequences are analyzed in the  
38 context of virus introductions, chain of transmissions, and possible links to earlier  
39 strains from other regions of the world. Phylogenetic analysis showed multiple  
40 spatiotemporal introductions of SARS-CoV-2 into the UAE from Asia, Europe,  
41 and the Middle East during the early phase of the pandemic. We also provide  
42 evidence for early community-based transmission and catalogue new mutations in  
43 SARS-CoV-2 strains in the UAE. Our findings contribute to the understanding of  
44 the global transmission network of SARS-CoV-2.

45 **Keywords:** SARS-CoV-2; COVID-19; Dubai; United Arab Emirates; whole  
46 genome sequencing; molecular phylogeny; epidemiology

47 **Introduction**

48 In December 2019, several cases of a new respiratory illness (now called COVID-19)  
49 were reported in the city of Wuhan (Hubei province, China) and in January 2020 it was  
50 confirmed these infections were caused by a novel coronavirus subsequently named  
51 SARS-CoV-2 [1-2]. On 12 March 2020, the ongoing SARS-CoV-2 outbreak was  
52 declared a pandemic by the World Health Organization (WHO) [3]. As of 3 June 2020,  
53 there have been 6.4 million laboratory-confirmed cases of COVID-19 and more than  
54 380,000 deaths in 188 countries [4].

55 Dubai in the United Arab Emirates (UAE) is a cosmopolitan metropolis that has  
56 become a popular tourist destination and home to one of the busiest airport hubs in the  
57 world connecting the east with the west [4]. Currently, the UAE has reported 35,788  
58 confirmed cases and 269 COVID-19-associated deaths (0.8% case fatality; 3 June 2020)

59 [5]. In view of Dubai's important tourism and travel connections, we attempted to  
60 characterize the full-genome sequence of SARS-CoV-2 strains from the index and early  
61 patients with COVID-19 in Dubai to gain a deeper understanding of the molecular  
62 epidemiology of the outbreak in Asia, Europe, and the Middle East.

63

## 64 **Methods**

### 65 **Human Subjects and Ethics Approval**

66 Sociodemographic and clinical data was extracted from the electronic medical records  
67 of the earliest 49 patients with laboratory confirmed SARS-CoV-2 from 29 January to  
68 18 March 2020 using the WHO case report form. This study was approved by the Dubai  
69 Scientific Research Ethics Committee - Dubai Health Authority (approval number  
70 #DSREC-04/2020\_02).

### 71 **SARS-CoV-2 Whole Genome Sequencing**

72 All 49 COVID-19 patients tested positive for SARS-CoV-2 by RT-qPCR using RNA  
73 extracted from nasopharyngeal swabs following the QIAamp Viral RNA Mini or the  
74 EZ1 DSP Virus Kits (Qiagen, Hilden, Germany). RNA libraries from all samples were  
75 then prepared for shotgun transcriptomic sequencing using the TruSeq Stranded Total  
76 RNA Library kit from Illumina (San Diego, CA, USA), following manufacturer's  
77 instructions. Libraries were sequenced using the NovaSeq SP Reagent kit (2 X 150  
78 cycles) from Illumina (San Diego, CA, USA). Sample L5630 underwent a target  
79 enrichment approach where double stranded DNA (synthesized using the QuantiTect  
80 Reverse Transcription Kit from Qiagen, Hilden, Germany) was amplified using 26  
81 overlapping primer sets covering most of the SARS-CoV-2 genome [6]. PCR products  
82 were then sheared by ultra-sonication (Covaris LE220-plus series, MA, USA) and

83 prepared for sequencing using the SureSelectXT Library Preparation kit (Agilent, CA,  
84 USA). This library was sequenced using the Illumina MiSeq Micro Reagent Kit, V2 (2  
85 X 150 cycles).

### 86 **SARS-CoV-2 Genome Assembly**

87 High quality (>Q30) sequencing reads were trimmed and then aligned to the reference  
88 SARS-CoV-2 genome from Wuhan, China (GenBank accession number:  
89 NC\_045512.2) using a custom-made bioinformatics pipeline (Fig. S1). Assembled  
90 genomes with at least 20X average coverage across most nucleotide positions (56-  
91 29,797) were used for subsequent phylogenetic analysis (Table S1). A total of 25 viral  
92 genomes (24 by shotgun and 1 by target enrichment) met this inclusion criterion and  
93 were submitted to the Global Initiative on Sharing All Influenza Data (GISAID)  
94 database under accession IDs: EPI\_ISL\_435119-435142 (Table S2).

### 95 **Phylogenetic Analysis**

96 We downloaded 157 global non-UAE sequences (Table S2) with largely complete  
97 genomes (nucleotide positions 56-29,797) submitted to GISAID EpiCoV  
98 (<https://www.epicov.org/>) between December 2019 and 04 March 2020 [7]. All 182  
99 sequences, including the 25 UAE sequences generated in this study, were analyzed  
100 using Nexstrain [8], which consists of Augur v6.4.3 pipeline for multiple sequence  
101 alignment (MAFFT v7.455 [9]) and phylogenetic tree construction (IQtree v1.6.12  
102 [10]). Tree topology was assessed using the fast bootstrapping function with 1000  
103 replicates. Tree visualization and annotations were performed in FigTree v1.4.4 [11] for  
104 Figure 1 and in auspice v2.13.0 tool [8] for Figure 2. SARS-CoV-2 clades annotations  
105 were performed in auspice v2.13.0 and cross-checked with nextstrain.org as of 12 May  
106 2020.

107

## 108 **Results**

### 109 **Patient Cohort and SARS-CoV-2 Whole Genome Sequencing**

110 The 49 patients included in this study were the earliest confirmed cases in the UAE. The  
111 time period of 29 January to 18 March 2020 was specifically selected to focus on early  
112 SARS-CoV-2 viral introductions into the UAE. The first index patient in the UAE was  
113 reported on the 29 January 2020. Subsequently, Emirates airlines suspended flights to  
114 and from 30 global destinations from 18 March 2020 and Dubai airport was closed to  
115 passenger flights on 25 March 2020; hence, patients after 18 March 2020 were expected  
116 to be more likely a result of community transmission as opposed to imported infections.  
117 The index patient in the UAE was a female Chinese tourist (aged 63 years) travelling  
118 from Wuhan with other family members to visit her son in Dubai. The Chinese family  
119 arrived in Dubai on 16 January 2020 and tested positive on the 29 January 2020 (Table  
120 1). Over the next seven weeks, there were multiple new cases among tourists and  
121 residents with travel history (44.9% had travel history from Europe) (Table 1). Nearly  
122 two-thirds (63.3%) of patients were male and 61.2% were aged between 20 and 44  
123 years reflecting the young age structure of the UAE population [4]. Majority of patients  
124 (88%) were asymptomatic or had mild symptoms and only four required intensive care  
125 with invasive ventilation.

126 SARS-CoV-2 whole genome sequencing was performed on all 49 COVID-19  
127 patient samples. Only genomes with almost complete coverage (n=25, Methods) were  
128 used for phylogenetic analysis. The 25 genomes were obtained from cases with disease  
129 onset in late January (n=1), early February (n=1), late February (n=6), early March  
130 (n=8), and late March (n=9). Of those, approximately two-thirds were male and aged

131 between 10 and 40 years (Table 1).

### 132 **Phylogenetic Analysis**

133 To understand early viral transmission in Dubai in the global context, we performed  
134 phylogenetic analysis on the 25 novel viral genomes we sequenced from early patients  
135 in the UAE (Table 1) in this study (Methods) along with 157 largely complete SARS-  
136 CoV-2 genomes deposited in GISAID from different countries between December 2019  
137 and early March 2020 [7] (Table S1).

138 Consistent with multiple independent introductions, the UAE SARS-CoV-2  
139 isolates were distributed across the phylogenetic tree (Figure 1). The majority (76%)  
140 clustered with clades A2a (48%) and A3 (28%) which are largely composed of isolates  
141 from COVID-19 patients in Europe and Iran, respectively. This clearly suggests that the  
142 major introductions into the UAE during the early phase of the pandemic originated  
143 from Europe and the Middle East/Iran.

144 Supporting its European origin, all individuals with the A2a clade isolates were  
145 mostly European and/or with recent travel history to a European country, mainly to Italy  
146 (n=4), Germany (n=3), United Kingdom (n=2), Spain (n=1), and Norway (n=1) (Table  
147 1 and Figure 2). Onset of symptoms reported in this group was within or after the  
148 second week of March (Table 1) suggesting that the viral infections in this group could  
149 have occurred during late February to early March. Of note, a SARS-CoV-2 isolate  
150 submitted from Mexico (GISAID ID: EPI\_ISL\_412972) was 100% identical to that  
151 from an Italian expatriate working in the UAE (L0881), while another submitted in  
152 Germany (GISAID ID: EPI\_ISL\_412912) differed by a single mutation (Figure 1). All  
153 three individuals had a recent travel history to Italy and overlapping infection time  
154 frames (late February – early March). Within this group, isolates from patients L1758,

155 L0484, and L2185 were identical (Figure 2) suggesting a possible common direct  
156 source of transmission.

157 Isolates in the A3 clade were obtained from five individuals with travel history  
158 to Iran (L2409, L6627, L0904, L0184, and L4682), one Indian resident (L0231), and  
159 one Indian tourist (L0068) (Figure 2). Onset of symptoms for the five individuals with  
160 travel history in this group was reported to be around 21-24 February (Table 1). Patient  
161 L0231 had no travel history and reported symptom onset on 7 March suggesting a  
162 possible community-based transmission event. Interestingly, all but one isolate obtained  
163 from patient L4682 – the only patient in this group with severe clinical presentation –  
164 shared a common ancestral strain identical to that obtained from patient L2409. The  
165 SARS-CoV-2 isolate from L4682 had two unique missense variants in the ORF1ab  
166 gene (Table S3) which might be worth investigating for any possible biological  
167 effect(s). Consistent with its Iranian origin, a SARS-CoV-2 sequence submitted by the  
168 University of Sydney (GISAID ID: EPI\_ISL\_412975) on 28 February 2020 differed by  
169 only two mutations from that of L2409, and both this Iranian male tourist and the  
170 Australian male had a recent travel history to Iran. We speculate that individuals with  
171 travel history to Iran around this time frame (L8386, L6867, and L3280), for whom a  
172 full viral genome sequence could not be obtained, were also very likely to cluster within  
173 the A3 clade.

174 Only one viral strain obtained from L5630, a family member of the early  
175 Chinese index patient, belonged to the B2 clade. Although we did not obtain full viral  
176 genome sequences from the other members of that Chinese family, we expect that all  
177 had a similar strain to L5630. Interestingly, our data do not suggest any transmission of  
178 this clade at least among the earliest patients (Figure 2) included in this study which is

179 consistent with the reported early detection and isolation of this family. This finding  
180 also supports the notion of secondary source(s) for the ongoing local transmission.

181 The remaining five isolates did not belong to A2a, A3, B2, or any of the clades  
182 on nextrain.org as of 12 May 2020, suggesting earlier introduction(s). Those isolates  
183 were obtained from four Asians, two residents (L4280, L6599) and two tourists (L4184,  
184 L9766), and one Czech resident (L1014) working as an airline cabin crew with travel  
185 history to Austria (Table 1). Consistent with the Asian predominance among this patient  
186 group and the fewer (1 or 2) mutations for most of their isolates (4 out of 5) relative to  
187 the Wuhan reference genome (Figure 2), several early viral strains submitted in Asia  
188 clustered very closely to this group (Figure 1). L4280 was the first sequenced patient  
189 without travel history and became infected after transporting a work colleague, L0826,  
190 to hospital. Patient L0826 reported symptoms onset on 22 January suggesting that  
191 community-based transmission started in the UAE in early-to-mid January. L6599 was  
192 an Indian expatriate living with three other Filipino and Sri Lankan expatriates (L3715,  
193 L2771, L8480) (Table 1). All four individuals had no documented recent travel history  
194 suggesting local transmission, and although full viral genome sequences could only be  
195 obtained from one patient L6599, it is very likely that all have related isolates.

196 In aggregate, we identified 70 variants relative to the reference GenBank SARS-  
197 CoV-2 sequence NC\_045512.2. The majority of these variants were missense (n=41)  
198 with the most frequent nucleotide change being C>T (n=33), and more than half (38/70)  
199 were localized in the ORF1ab gene (Table S3). Notably, 17 out of the 70 variants were  
200 novel as they were not identified in the Chinese National Center for Bioinformation  
201 Database (<https://bigd.big.ac.cn/ncov/variation/annotation>; last accessed April 29,  
202 2020). Of those, 12 were coding missense variants distributed across the ORF1ab (n=8),  
203 S (n=1), ORF7a (n=1), and the N (n=2) genes.



204

205 **Discussion**

206 Our findings suggest multiple independent spatiotemporal introductions of SARS-CoV-  
207 2 into the UAE where the majority of introductions (76%) were from Iran and Europe  
208 during two different time frames (mid-late February and early March, respectively).  
209 Although we show evidence for possible local transmission within the Middle  
210 Eastern/Iranian isolates, it will be important to sequence further isolates at subsequent  
211 dates to determine whether these introductions succeeded in seeding more clustering  
212 and whether such clustering was affected by proactive and vigilant public health  
213 measures, such as transitioning to online learning for schools and universities,  
214 implementing work-from-home protocols across all sectors, and nationwide disinfection  
215 campaigns.

216 Six isolates (22%) did not cluster with the European or Iranian groups and  
217 represented earlier introductions which did not appear to seed larger clusters in our  
218 sampled cohort. However, additional sequencing is needed to determine the extent of  
219 community transmission, especially given that our data strongly suggest that the earliest  
220 patient (early to mid-January) in the UAE could have been a secondary infection from  
221 one of those introductions.

222 The new SARS-CoV-2 mutations identified in the UAE warrant further  
223 investigation to explore whether they influence viral characteristics, especially  
224 pathogenicity, or provide important information for vaccine development. One of the  
225 major strengths of the study was the non-biased representative sample of early cases,  
226 including the index family cluster, in Dubai from the only central testing lab, along with  
227 detailed demographic and clinical information. Limitations included the inability to  
228 conduct full whole genome sequencing on more samples most likely due to low viral

229 load issues, although we were able to deduce the origin of transmission in most of those  
230 individuals based on travel history. Regardless, this study contributes important  
231 molecular epidemiological data that can be used to further understand the global  
232 transmission network of SARS-CoV-2.

233

#### 234 **About the Author**

235 Dr. Abou Tayoun is an associate professor in the Department of Genetics, Mohammed  
236 Bin Rashid University of Medicine and Health Sciences. He is also the director of Al  
237 Jalila Genomics Center at Al Jalila Children's Specialty Hospital. His research interests  
238 are focused around clinical and population genomics in general, and specifically in the  
239 Middle East.

240

#### 241 **References**

- 242 1. Ashour HM, Elkhatib WF, Rahman MM, Elshabrawy HA. Insights into the  
243 recent 2019 novel coronavirus (SARS-CoV-2) in light of past human  
244 coronavirus outbreaks. *Pathogens*. 2020;9(3):E186.  
245 <https://doi.org/10.3390/pathogens9030186>.
- 246 2. Uddin M, Mustafa F, Rizvi TA, Loney T, Al Suwaidi H, Hassan Al-Marzouqi  
247 AH, et al. SARS-CoV-2/COVID-19: Viral genomics, epidemiology, vaccines,  
248 and therapeutic interventions. *Viruses*. 2020;12(5):526.  
249 <https://doi.org/10.3390/v12050526>.
- 250 3. World Health Organization (WHO). Coronavirus disease 2019 (COVID-19)  
251 Situation Report – 52. Geneva: WHO; 12 Mar 2020. Available from:  
252 [https://www.who.int/docs/default-source/coronaviruse/situation-](https://www.who.int/docs/default-source/coronaviruse/situation-reports/20200312-sitrep-52-covid-19.pdf?sfvrsn=e2bfc9c0_4)  
253 [reports/20200312-sitrep-52-covid-19.pdf?sfvrsn=e2bfc9c0\\_4](https://www.who.int/docs/default-source/coronaviruse/situation-reports/20200312-sitrep-52-covid-19.pdf?sfvrsn=e2bfc9c0_4)

- 254 4. Johns Hopkins Center for Systems Sciences and Engineering. COVID-19  
255 Dashboard. Available from:  
256 [https://www.arcgis.com/apps/opsdashboard/index.html#/bda7594740fd4029942](https://www.arcgis.com/apps/opsdashboard/index.html#/bda7594740fd40299423467b48e9ecf6)  
257 [3467b48e9ecf6](https://www.arcgis.com/apps/opsdashboard/index.html#/bda7594740fd40299423467b48e9ecf6)
- 258 5. Loney T, Aw TC, Handysides DG, Ai R, Blair I, Grivna M, et al. An analysis of  
259 the health status of the United Arab Emirates: the 'Big 4' public health issues.  
260 *Glob Health Action*. 2013;6:20100. <https://doi.org/10.3402/gha.v6i0.20100>.
- 261 6. Wu F, Zhao S, Yu B, Chen YM, Wang W, Song ZG, et al. A new coronavirus  
262 associated with human respiratory disease in China. *Nature*.  
263 2020;579(7798):265–9. <https://doi.org/10.1038/s41586-020-2008-3>.
- 264 7. Forster P, Forster L, Renfrew C, Fortser M. Phylogenetic network analysis of  
265 SARS-CoV-2 genomes. *Proc Natl Acad Sci U S A*. 2020;117(17):9241–3.  
266 <https://doi.org/10.1073/pnas.2004999117>.
- 267 8. Hadfield J, Megill C, Bell SM, Huddleston J, Potter B, Callender C, et al.  
268 Nextstrain: real-time tracking of pathogen evolution. *Bioinformatics*.  
269 2018;34(23):4121–3. <https://doi.org/10.1093/bioinformatics/bty407>.
- 270 9. Katoh K, Misawa K, Kuma K, Miyata T. MAFFT: A novel method for rapid  
271 multiple sequence alignment based on fast Fourier transform. *Nucleic Acids*  
272 *Res*. 2002;30(14):3059–66. <https://doi.org/10.1093/nar/gkf436>.
- 273 10. Chernomor O, von Haeseler A, Quang Minh B. Terrace aware data structure for  
274 phylogenomic inference from supermatrices. *Systematic Biology*.  
275 2016;65(6):997–1008. <https://doi.org/10.1093/sysbio/syw037>.
- 276 11. Rambaut. A. FigTree 1.4.2 Software. Institute of Evolutionary Biology, Univ.  
277 Edinburg.  
278

279 **Figure Legends**

280 **Figure 1.** Phylogenetic relationships of SARS-CoV-2 isolates from early patients in  
281 Dubai and early global strains. A maximum likelihood phylogeny of 182 SARS-CoV-2  
282 genomes (157 obtained from GISAID as of early March and 25 genomes in this study).  
283 Bootstrap support values >70% supporting major branches are shown. The 3 non-UAE  
284 isolates in clades A2a and A3 namely, Mexico/CDMX-InDRE\_01,  
285 Germany/Baden/Wuerttemberg-1, and Australia/NSW05 are the GISAID ID:  
286 EPI\_ISL\_412972, GISAID ID: EPI\_ISL\_412912, and GISAID ID: EPI\_ISL\_412975,  
287 respectively, referred to in the main text. Scale bar represents number of nucleotide  
288 substitutions per site. UAE = United Arab Emirates.

289

290 **Figure 2.** Relationship of early SARS-CoV-2 isolates in the UAE based on  
291 phylogenetic analysis and patients' travel history. A maximum likelihood phylogenetic  
292 tree of all 25 UAE SARS-CoV-2 sequences, generated in this study, is shown. The two  
293 Wuhan genomes (Wuhan-Hu-1/2019, GISAID ID: EPI\_ISL\_402125 and  
294 Wuhan/WH01/2019, GISAID ID: EPI\_ISL\_406798) were used as reference genomes  
295 (blue filled circles). UAE viral strains (black filled circles) were labeled with sample ID  
296 and Nationality (in brackets). Bootstrap support values >70% supporting major  
297 branches are shown. Branch lengths mark divergence from the reference Wuhan SARS-  
298 CoV-2 genome (GenBank accession number: NC\_045512.2) in mutations numbers,  
299 while branch color represents travel history. Travel history to Europe for patients  
300 UAE/L1758, UAE/L0484, UAE/L2185, and UAE/L0881 is obscured by vertical lines.  
301 UAE = United Arab Emirates.

302

303 **Author Contributions**

304 AAA, AT, NN, and TL conceived the study and drafted the protocol. All authors  
305 provided critical input into the protocol. AAA, AAK, and HK coordinated the ethical  
306 approval and sample retrieval. RV and ZD conducted the RT-qPCR analysis. AT, SR,  
307 and DH performed the whole genome sequencing and phylogenetic analysis. HK  
308 performed data extraction from the medical records and TL completed data analysis for  
309 the manuscript. AT and TL drafted the manuscript, AAA and NN refined it before  
310 AAK, AS, DH HA, HK, MU, QH, RH, RHA, RV, SR, and ZD, provided comments and  
311 feedback on the first draft. All authors read and approved the final version of the  
312 manuscript.

313

#### 314 **Financial Support and Conflict of Interest Disclosure**

315 This work was supported by internal funds from the College of Medicine, Mohammed  
316 Bin Rashid University of Medicine and Health Sciences. Authors have no conflicts of  
317 interest to disclose.

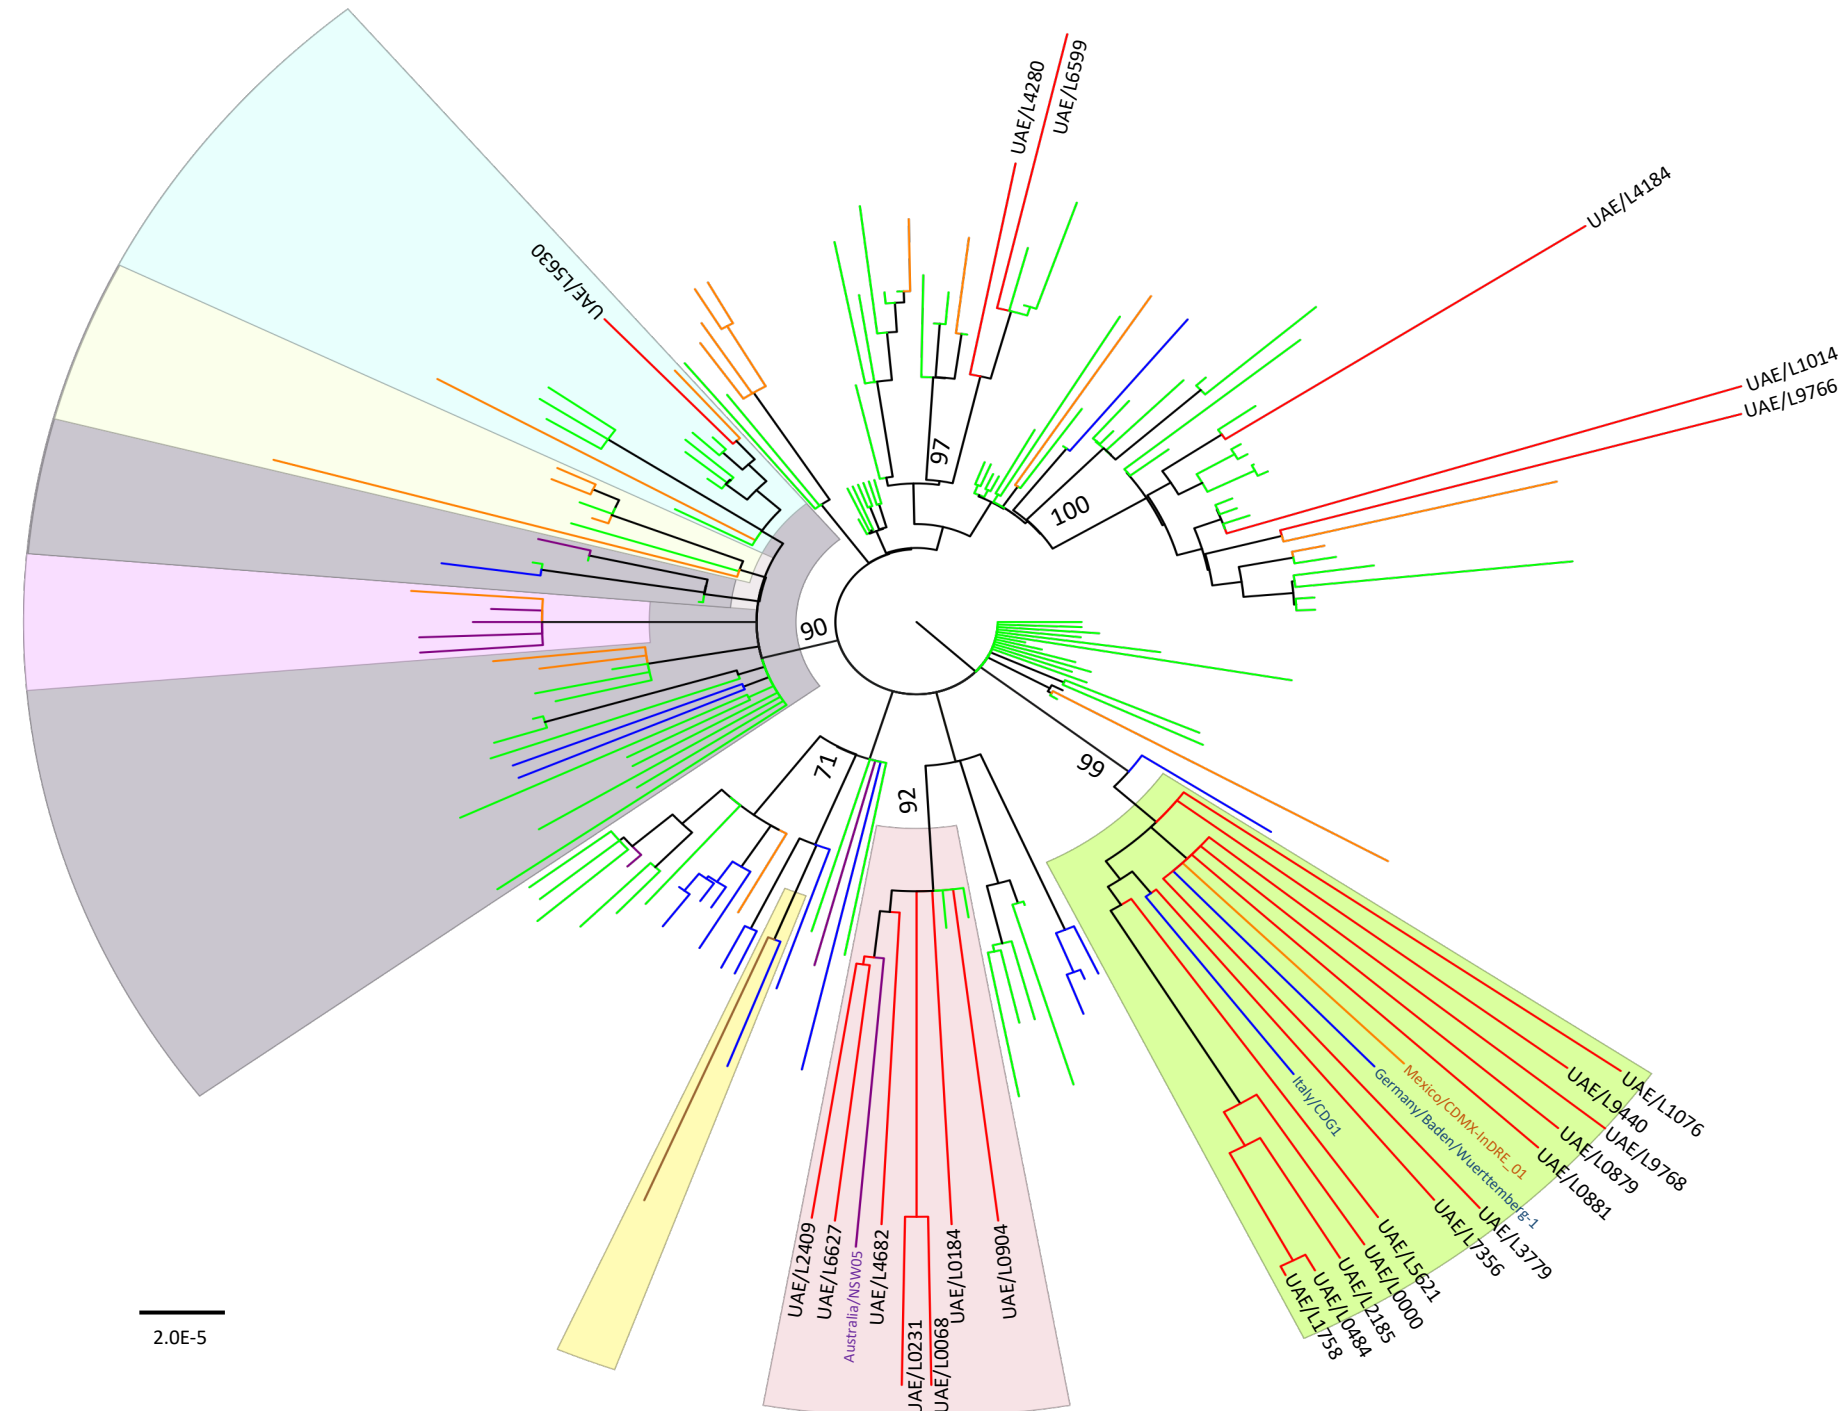

| Clade (Shades)                                                                        |     | Regions (Branches)                                                                    |               |
|---------------------------------------------------------------------------------------|-----|---------------------------------------------------------------------------------------|---------------|
|    | A2a |    | UAE           |
|   | A3  |    | Europe        |
|  | A1a |  | Asia          |
|  | B   |  | North America |
|  | B4  |  | Australia     |
|  | B1  |  | South America |
|  | B2  |                                                                                       |               |

2.0E-5

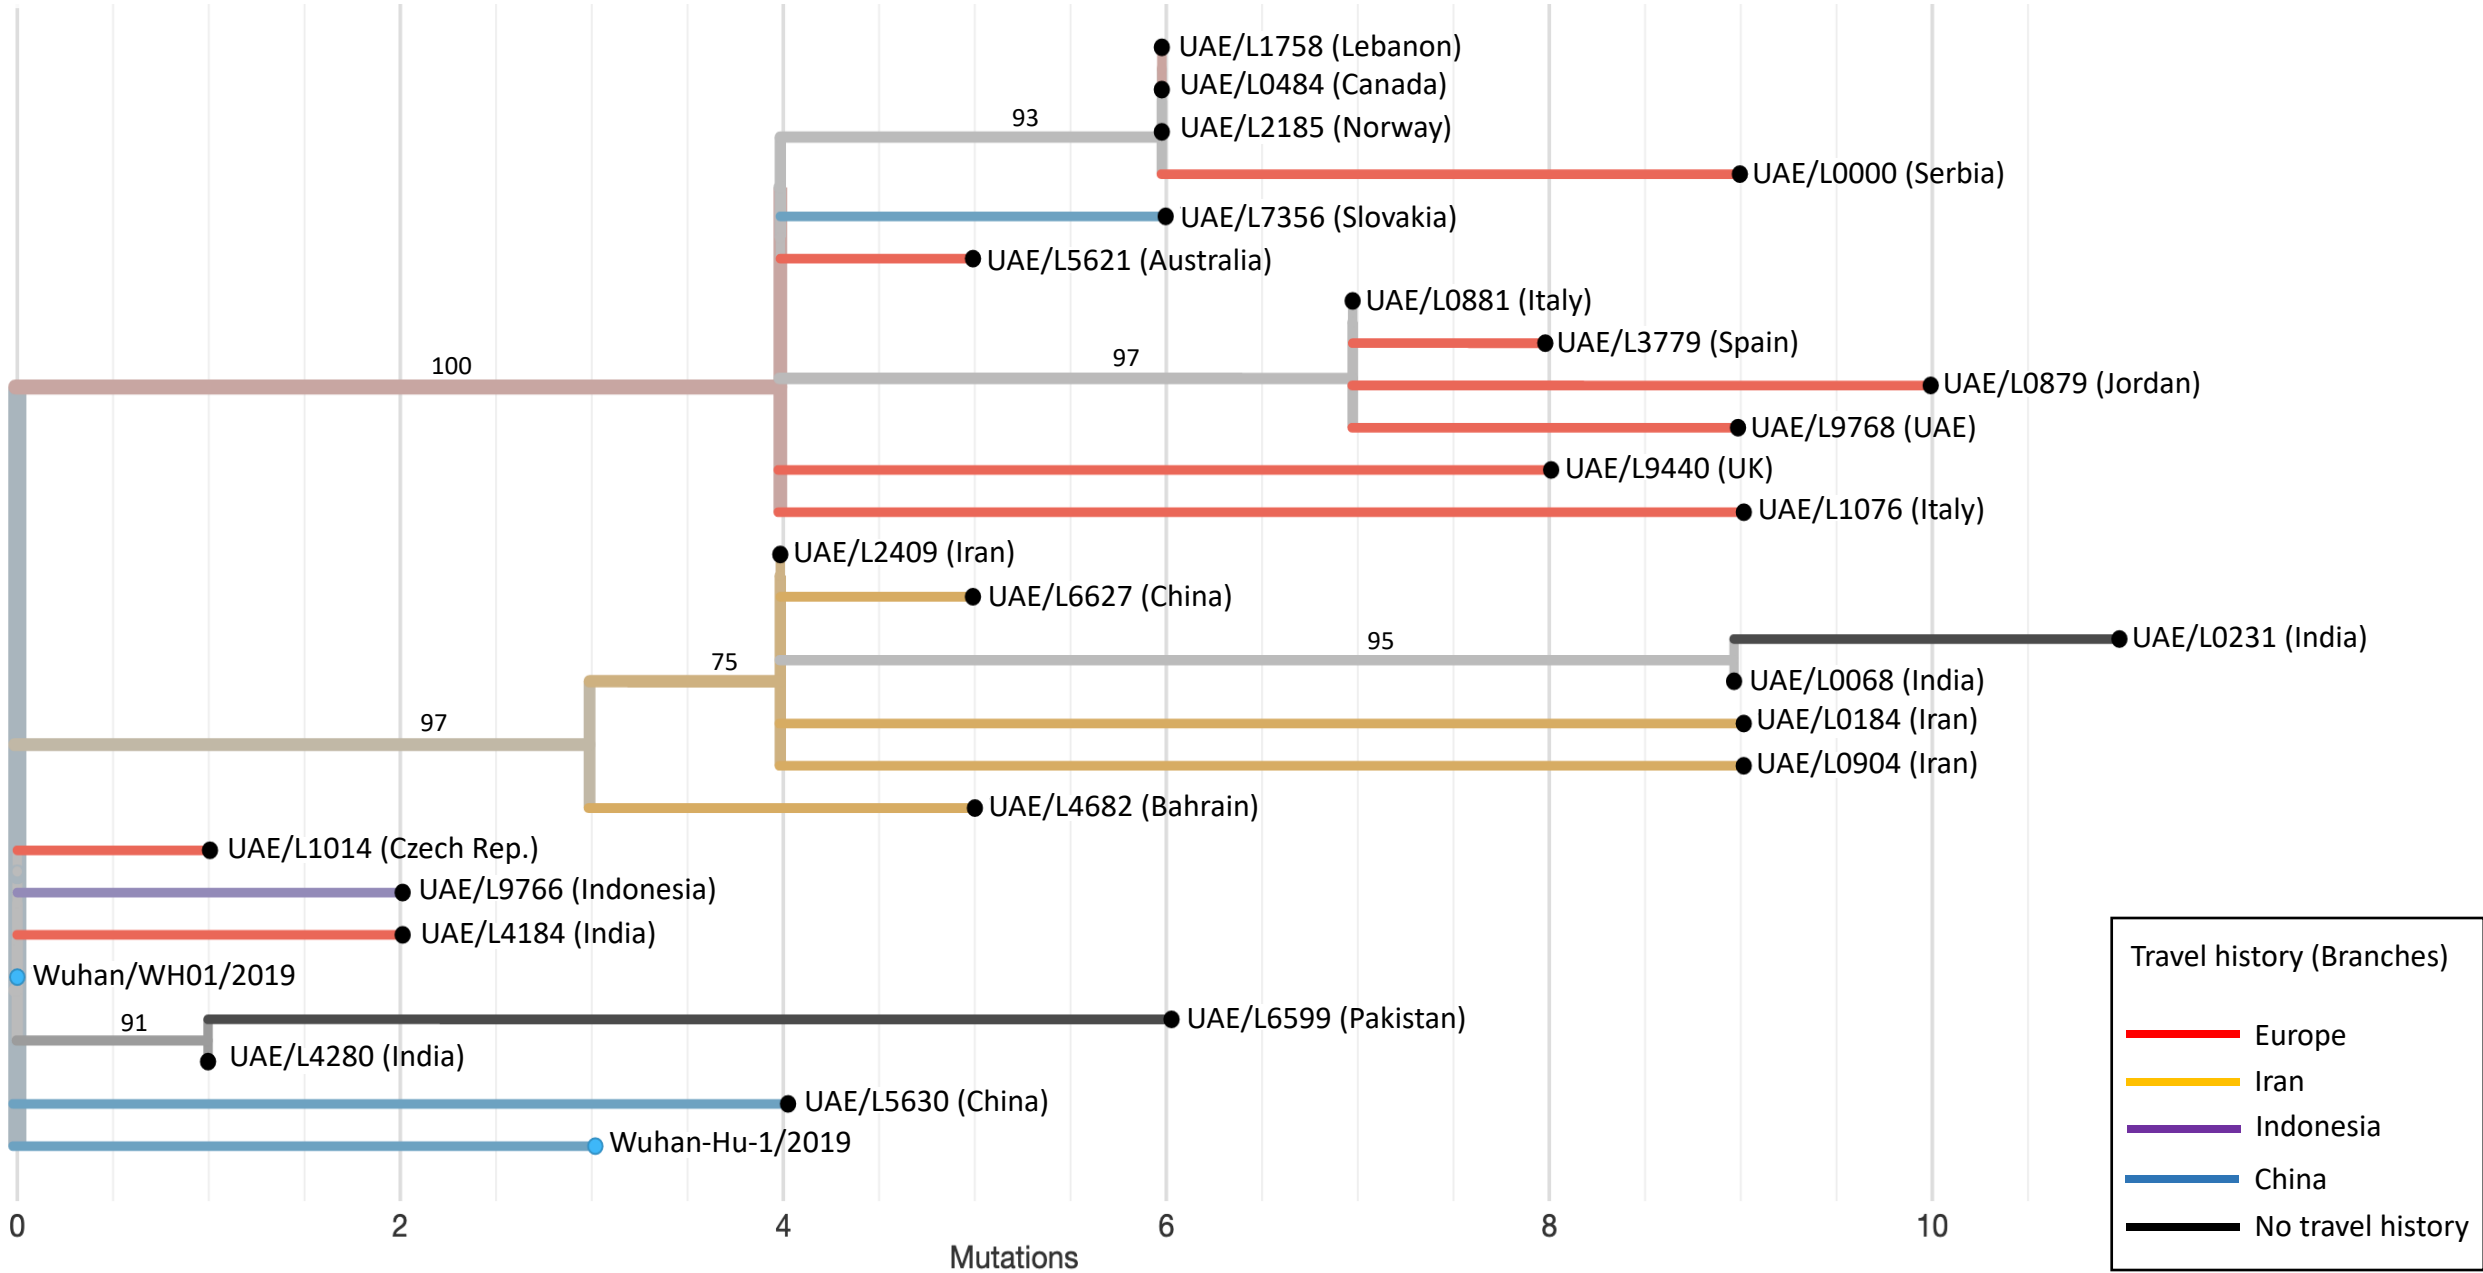

**Table 1.** Sociodemographic and clinical characteristics of the index and early patients (n=49) with laboratory-confirmed SARS-CoV2 in Dubai, United Arab Emirates, 29 January-18 March 2020

| Study ID | Age (years) | Sex    | Nationality | Resident /Tourist | Travel History                  | Symptom Onset Date 2020‡ | Severity        | Self-Reported History Fever/Cough | ICU Admission/ Ventilator | Full Genome Sequence | GISAIID Accession ID |
|----------|-------------|--------|-------------|-------------------|---------------------------------|--------------------------|-----------------|-----------------------------------|---------------------------|----------------------|----------------------|
| L8156    | 63          | Female | China       | Tourist           | Wuhan, China                    | 09 Jan                   | Asymp/Mild      | No/Yes                            | No/No                     | No                   | -                    |
| L8497    | 38          | Female | China       | Tourist           | Wuhan, China                    | 24 Jan                   | Asymp/Mild      | Yes/No                            | No/No                     | No                   | -                    |
| L5630*   | 9           | Male   | China       | Tourist           | Wuhan, China                    | 28 Jan                   | Asymp/Mild      | No/No                             | No/No                     | Yes                  | EPI_ISL_435137       |
| L8205    | 36          | Male   | China       | Resident          | Wuhan, China                    | 28 Jan                   | Asymp/Mild      | No/No                             | No/No                     | No                   | -                    |
| L0826    | 42          | Male   | Philippines | Resident          | None/Contact with positive case | 22 Jan                   | Severe/Critical | Yes/Yes                           | Yes/Yes                   | No                   | -                    |
| L4280    | 36          | Male   | India       | Resident          | None/Contact with positive case | 08 Feb                   | Asymp/Mild      | No/No                             | No/No                     | Yes                  | EPI_ISL_435134       |
| L3715    | 34          | Male   | Philippines | Resident          | None/Contact with positive case | 16 Feb                   | Asymp/Mild      | No/No                             | No/No                     | No                   | -                    |
| L2771    | 25          | Male   | Sri Lanka   | Resident          | None/Contact with positive case | 16 Feb                   | Asymp/Mild      | No/No                             | No/No                     | No                   | -                    |
| L8480    | 21          | Male   | Sri Lanka   | Resident          | None/Contact with positive case | 16 Feb                   | Asymp/Mild      | No/No                             | No/No                     | No                   | -                    |
| L8386    | 70          | Male   | Iran        | Tourist           | Iran                            | 17 Feb                   | Severe/Critical | No/Yes                            | Yes/Yes                   | No                   | -                    |
| L6599    | 41          | Male   | Pakistan    | Resident          | None/Contact with positive case | 21 Feb                   | Asymp/Mild      | No/No                             | No/No                     | Yes                  | EPI_ISL_435138       |
| L0904    | 35          | Male   | Iran        | Tourist           | Iran                            | 21 Feb                   | Asymp/Mild      | Yes/Yes                           | No/No                     | Yes                  | EPI_ISL_435126       |
| L6867    | 60          | Female | Iran        | Tourist           | Iran                            | 22 Feb                   | Asymp/Mild      | No/Yes                            | No/No                     | No                   | -                    |
| L2409    | 59          | Male   | Iran        | Tourist           | Iran                            | 23 Feb                   | Asymp/Mild      | Yes/No                            | No/No                     | Yes                  | EPI_ISL_435131       |



|       |    |        |              |          |                               |        |                 |         |         |     |                |
|-------|----|--------|--------------|----------|-------------------------------|--------|-----------------|---------|---------|-----|----------------|
| L0184 | 64 | Female | Iran         | Tourist  | Iran                          | 23 Feb | Asymp/Mild      | Yes/Yes | No/No   | Yes | EPI_ISL_435121 |
| L4682 | 64 | Male   | Bahrain      | Tourist  | Iran                          | 24 Feb | Severe/Critical | Yes/No  | Yes/Yes | Yes | EPI_ISL_435135 |
| L6627 | 29 | Male   | China        | Resident | Iran                          | 24 Feb | Asymp/Mild      | Yes/No  | No/No   | Yes | EPI_ISL_435139 |
| L1802 | 38 | Male   | Dominica     | Resident | Iran and Pakistan             | 28 Feb | Moderate        | Yes/Yes | No/No   | No  | -              |
| L7100 | 44 | Female | Iran         | Resident | Iran                          | 29 Feb | Asymp/Mild      | Yes/No  | No/No   | No  | -              |
| L5752 | 38 | Female | Italy        | Tourist  | Italy                         | 04 Mar | Asymp/Mild      | No/No   | No/No   | No  | -              |
| L8477 | 36 | Female | India        | Resident | US/contact with positive case | 05 Mar | Asymp/Mild      | Yes/No  | No/No   | No  | -              |
| L5970 | 70 | Female | Italy        | Tourist  | Milan, Italy                  | 05 Mar | Severe/Critical | Yes/No  | Yes/Yes | No  | -              |
| L3280 | 3  | Male   | Saudi Arabia | Tourist  | Iran                          | 07 Mar | Asymp/Mild      | No/No   | No/No   | No  | -              |
| L7356 | 23 | Male   | Slovakia     | Resident | China and Asia                | 07 Mar | Asymp/Mild      | No/No   | No/No   | Yes | EPI_ISL_435140 |
| L0509 | 36 | Male   | Kuwait       | Resident | Austria and Germany           | 07 Mar | Asymp/Mild      | Yes/No  | No/No   | No  | -              |
| L0231 | 54 | Male   | India        | Resident | None                          | 07 Mar | Moderate        | Yes/Yes | No/No   | Yes | EPI_ISL_435122 |
| L9766 | 28 | Female | Indonesia    | Tourist  | Indonesia                     | 07 Mar | Asymp/Mild      | Yes/Yes | No/No   | Yes | EPI_ISL_435142 |
| L4184 | 28 | Female | India        | Tourist  | Ireland and France            | 08 Mar | Asymp/Mild      | Yes/No  | No/No   | Yes | EPI_ISL_435133 |
| L0484 | 28 | Male   | Canada       | Resident | Germany                       | 09 Mar | Asymp/Mild      | Yes/Yes | No/No   | Yes | EPI_ISL_435123 |
| L1758 | 30 | Male   | Lebanon      | Resident | Germany                       | 10 Mar | Asymp/Mild      | No/No   | No/No   | Yes | EPI_ISL_435129 |
| L5621 | 58 | Male   | Australia    | Tourist  | Italy                         | 10 Mar | Asymp/Mild      | Yes/No  | No/No   | Yes | EPI_ISL_435136 |
| L9440 | 35 | Male   | UK           | Resident | Italy                         | 10 Mar | Asymp/Mild      | No/No   | No/No   | Yes | EPI_ISL_435141 |
| L0860 | 46 | Male   | France       | Resident | US through France             | 10 Mar | Asymp/Mild      | No/Yes  | No/No   | No  | -              |
| L2185 | 46 | Male   | Norway       | Tourist  | Norway                        | 12 Mar | Asymp/Mild      | No/No   | No/No   | Yes | EPI_ISL_435130 |
| L9928 | 42 | Female | Spain        | Resident | Spain                         | 13 Mar | Asymp/Mild      | Yes/No  | No/No   | No  | -              |
| L0068 | 33 | Male   | India        | Tourist  | India                         | 13 Mar | Asymp/Mild      | Yes/No  | No/No   | Yes | EPI_ISL_435120 |

|       |    |        |            |          |                                 |        |            |         |       |     |                |
|-------|----|--------|------------|----------|---------------------------------|--------|------------|---------|-------|-----|----------------|
| L1014 | 27 | Female | Czech Rep. | Resident | Austria                         | 13 Mar | Asymp/Mild | Yes/Yes | No/No | Yes | EPI_ISL_435127 |
| L1076 | 30 | Female | Italy      | Resident | Italy                           | 14 Mar | Asymp/Mild | No/No   | No/No | Yes | EPI_ISL_435128 |
| L0000 | 27 | Female | Serbia     | Resident | UK/contact with positive case   | 14 Mar | Asymp/Mild | No/No   | No/No | Yes | EPI_ISL_435119 |
| L3779 | 32 | Female | Spain      | Resident | Spain                           | 14 Mar | Asymp/Mild | Yes/Yes | No/No | Yes | EPI_ISL_435132 |
| L7355 | 20 | Male   | UAE        | Resident | UK                              | 14 Mar | Asymp/Mild | No/Yes  | No/No | No  | -              |
| L0549 | 24 | Female | Lebanon    | Resident | None/contact with positive case | 15 Mar | Asymp/Mild | No/No   | No/No | No  | -              |
| L9768 | 19 | Male   | UAE        | Resident | UK                              | 18 Mar | Asymp/Mild | No/Yes  | No/No | Yes | EPI_ISL_435143 |
| L4519 | 54 | Male   | Iran       | Resident | Iran                            | NR     | NR         | NR      | NR    | No  | -              |
| L9333 | 26 | Male   | Italy      | Resident | Italy                           | NR     | NR         | NR      | NR    | No  | -              |
| L9756 | 53 | Male   | Italy      | Resident | Italy                           | NR     | NR         | NR      | NR    | No  | -              |
| L0879 | NR | Female | Jordan     | Resident | Germany                         | NR     | NR         | NR      | NR    | Yes | EPI_ISL_435124 |
| L0880 | NR | Female | Germany    | Resident | Germany                         | NR     | NR         | NR      | NR    | No  | -              |
| L0881 | NR | Male   | Italy      | Resident | Italy                           | NR     | NR         | NR      | NR    | Yes | EPI_ISL_435125 |

\*There was a second grandchild in the Chinese family cluster from Wuhan who remained negative throughout all testing. ‡Self-reported onset of symptoms extracted from medical records; NR, Not Reported; UK, United Kingdom; UAE, United Arab Emirates; US, United States.
